# Supplementary material
Source: ML conference proceedings conference paper supplement (https://openaccess.thecvf.com/content/CVPR2026/html/Qiu_LongVideo-R1_Smart_Navigation_CVPR_2026_paper.html)
Supplement: Supplementary file 1 [file Qiu_LongVideo-R1_Smart_Navigation_CVPR_2026_supplemental.pdf]

# LongVideo-R1: Smart Navigation for Low-cost Long Video Understanding

## Supplementary Material

The supplementary document provides (1) details of our hierarchical video definition in A;(2)comprehensive implementation details including the prompts we used for data generation and the experiment setup in B;(3)more qualitative examples and ultra long video examples in C;(4)failure examples and analysis in D.

### A. Hierarchical Video Definition

To enable efficient localization of relevant segments within long videos without requiring any preprocessing, we represent each video using a hierarchical tree structure. Given a tree depth  $D$  and width  $W$ , the root node corresponds to the entire video. The root is evenly divided into  $W$  child segments, each of which is recursively divided into another  $W$  sub-segments. Repeating this process yields a hierarchical video tree with  $D$  levels.

In practice, we set  $D = 3$ , and choose  $W$  adaptively according to video length. The leaf-level segment length is fixed at 16 seconds. Let *Duration* denote the total video length, then the number of leaf segments is  $Duration/16$ . We determine the width as:

$$W = \left( \frac{Duration}{16} \right)^{1/D},$$

which typically lies within 4 to 8 across all datasets.

To ensure that deeper nodes receive fine-grained visual signals, we adjust both frame sampling rate and spatial resolution according to the hierarchy. For the caption model, we use {256, 128, 64, 32} frames from level 0 to level 3, respectively. The corresponding image resolutions are set to

$$\frac{512}{2\sqrt{2}}, \frac{512}{2}, \frac{512}{\sqrt{2}}, 512,$$

ensuring that the overall number of visual tokens remains approximately constant across levels. This design guarantees consistent computation cost per caption call while enabling finer temporal and spatial detail as the model traverses downward in the hierarchy.

### B. Implementation Details

#### B.1. Environment Setup

During both data generation and model evaluation, we use Qwen-2.5-VL-72B as our *video\_cap* model and Qwen-2.5-VL-32B as our *video\_qa* model. These two components can be replaced by other models; for instance, Qwen-2.5-VL-32B is also capable of serving as an effective captioning model.

For CoTWT data generation, we employ GPT-5 as the central reasoning model. All SFT and RL training is conducted on a cluster with 8 NVIDIA A100 GPUs (80GB). Mixed-precision training and FSDP sharding are used to maximize training throughput.

| Configuration          | SFT                | RL                 |
|------------------------|--------------------|--------------------|
| Model init             | Qwen3-8B           | LongVideo-R1-SFT   |
| LLM sequence length    | 32768              | 32768              |
| Learning rate          | $1 \times 10^{-5}$ | $1 \times 10^{-6}$ |
| Learning rate schedule | cosine decay       | constant           |
| Training epochs        | 3                  | 2                  |
| Global batch size      | 32                 | 12                 |
| Training steps         | 384                | 696                |
| Rollout numbers        | -                  | 16                 |

Table 8. Training hyper-parameters.

#### B.2. Data Generation

We use a proprietary GPT-5 model to generate the CoTWT supervision signals. Since CGBench provides timestamp annotations for each question, we use CGBench as the primary source for CoTWT construction. CGBench contains approximately 1200 videos and 12,000 QA pairs. We use 800 videos and around 8000 QA pairs to construct the SFT data; after filtering, we obtain 5600 high-quality CoTWT trajectories.

The remaining 400 videos and approximately 4200 QA pairs are reserved for RL training.

The prompts used for data generation and caption extraction are listed in Table 9 and Table 10 of the appendix. Initially, we provided only the root-level caption as GPT-5’s starting context, but this resulted in unstable behavior and low accuracy (around 30%). We found that providing the  $W$  child captions from the highest-level nodes as initial information substantially improves stability and accuracy.

For all datasets (CGBench, LVBench, VideoMME-Long), the tree width  $W$  is set between 4 and 8. For EgoSchema, due to its large number of short 2-minute videos, we set  $W$  between 3 and 8.

#### B.3. Training hyper-parameters

We adopt Qwen3-8B as the central reasoning model for both SFT and RL training. The model receives the  $W$  highest-level captions as its initial observation and interacts with the video tree through a sequence of tool calls.

Training consists of two phases:

Table 9. System prompt for data generation.

**[BEGIN OF GOAL]**

You are a reasoning assistant designed to answer questions about a long video through hierarchical captions. The video is organized into three levels of temporal granularity:

1. High-level: The video is divided into **width** major segments.
2. Medium-level: Each High-level segment is further divided into **width** sub-segments.
3. Low-level: Each Medium-level segment is further divided into **width** finer sub-segments.

You will be asked a question about the video.

At the beginning, you are given **\*\*only the High-level captions\*\***.

Your goal is to answer the question as accurately as possible.

**[END OF GOAL]**

**[BEGIN OF REASONING AND TOOL USAGE INSTRUCTIONS]**

1. Reason first:

Before taking any action, carefully analyze whether the current information (captions you already have) is sufficient to answer the question.

2. If sufficient:

Directly provide your final answer inside `<answer></answer>` tags.

3. If insufficient:

Identify which part(s) of the video might contain the needed information. Then use one of the following tools:

- To obtain finer captions:

`<tool>get_caption((high_segment_id, medium_segment_id, low_segment_id))</tool>`

- Each of the three IDs is an integer from 1 to **width**.

- To request a Medium-level caption, provide (high\_segment\_id, medium\_segment\_id) only.

- To request a Low-level caption, provide the full triplet (high\_segment\_id, medium\_segment\_id, low\_segment\_id).

- To query visual information from the actual video segment:

`<tool>video_qa((high_segment_id, medium_segment_id, low_segment_id), query)</tool>`

- This tool sends the corresponding Low-level video segment to a specialized video QA module.

- The query should specify what exact information you need (e.g., “what color is the person’s shirt?”, “what object is on the table?”).

- You may only use video\_qa after you have already retrieved the corresponding Low-level caption for that segment.

4. Restriction:

In each reasoning round, you may only call one tool (either ‘get\_caption’ or ‘video\_qa’) once to obtain new information.

**[END OF REASONING AND TOOL USAGE INSTRUCTIONS]**

**[BEGIN OF FORMAT INSTRUCTIONS]**

Your reasoning and actions must follow this structure exactly: `<think>`Your internal reasoning process here. Analyze what information you have, what is missing, and which part might be relevant.`</think>` `<tool>`(get\_caption or video\_qa call here, if needed)`</tool>` or `<think>`...`</think>` `<answer>`Your final answer here (only when you are confident the information is sufficient).`</answer>`

**[END OF FORMAT INSTRUCTIONS]**

**SFT.** We train the model to imitate CoTWT trajectories by predicting reasoning process, search actions and answers. This stage helps the model acquire hierarchical search behavior and structured video reasoning skills.

**RL.** During RL, we pre-extract all hierarchical captions to accelerate training, while the *video\_qa* tool is invoked in real time. Qwen-2.5-VL-32B is deployed on two GPUs to

serve as the *video\_qa* module, while the remaining six GPUs are dedicated to RL training.

The detailed hyper-parameters are listed in Table 8.

**B.4. Time consumption calculation**

The total inference time of LongVideo-R1 consists of three components: (1) the forward-pass time of the reasoning model  $T_1$ , (2) the captioning time required for processing a

Table 10. Video Caption Model Prompt.

You are a video understanding expert. Please create a detailed description with timestamp information for the current video clip (which contains multiple frames arranged in chronological order).  
 You are given **num\_frame** uniformly sampled frames from the video, along with the timestamp (in seconds) of each frame in the entire video.  
 Description Guidelines:  
 -Dialogue Description Guidelines:  
 1)In addition to video frames, subtitle information for this video segment is also provided.  
 2)The output description must faithfully include the given subtitle content. Do not invent or add dialogues that are not provided. Avoid redundant repetition, maintain the original order of the lines, and ensure the sentences flow smoothly.  
 3)Your output should be around **num\_words** words.  
 -Whenever reasonable, include the provided timestamps in your description.  
 1)For multiple frames with short intervals that depict the same continuous action, you may merge them into a single description.  
 2)For example:This video begins at 0.0s with a scene featuring two individuals seated outdoors, engaging in a conversation. The subtitles indicate they are discussing the impact of the pandemic on their ability to shoot videos at a bar. By 14.0s, the dialogue shifts to their newfound regular appearances on a show called Scam Nation. At 28.0s, the conversation turns to the promotion of a product named Kraken, encouraging viewers to visit a website for...  
 Output Format:  
 Your response should be in the following format, wrapped with `<caption>/</caption>` tags: `"<caption>This clip (video) XXX</caption>"`.

video segment  $T_2$ , and (3) the time required for the video\_qa model to answer a query  $T_3$ . Let the average number of calls to LongVideo-R1, the video\_cap model, and the video\_qa model be  $C_1$ ,  $C_2$ , and  $C_3$ , respectively. Then the expected time cost for answering one question is:

$$T = C_1T_1 + C_2T_2 + C_3T_3.$$

Using VideoMME-Long as an example, the model requires on average 10.5 reasoning rounds per question. Therefore,  $C_1 = 10.5$ . The video\_qa model is invoked infrequently, with an average of  $C_3 = 0.36$  calls per question.

Since the average tree width for VideoMME-Long is  $W = 5$ , the initial step requires obtaining the  $W$  highest-level captions. During the subsequent reasoning process, every reasoning step except the one that triggers a video\_qa call requires an additional caption. Thus the expected number of caption calls is:

$$C_2 = W + C_1 - 1 - C_3 = 5 + 10.5 - 1 - 0.36 = 14.14.$$

Assuming Qwen-2.5-VL-32B is used for both video\_cap and video\_qa, the empirical average runtimes are:

$$T_1 \approx 2.5s, \quad T_2 \approx 7.0s, \quad T_3 \approx 2.7s.$$

Therefore, the expected end-to-end time required to answer a single question on VideoMME-Long is:

$$T = 10.5 \times 2.5 + 14.14 \times 7.0 + 0.36 \times 2.7 \approx 135s.$$

This result reflects the full hierarchical search procedure, including both caption retrieval and occasional fine-grained Video.QA queries.

### C. More Qualitative Examples

We provide additional qualitative results (Figure 6, Figure 7) and ultra-long video examples (Figure 5) in this section. These examples illustrate LongVideo-R1’s ability to perform hierarchical search, disambiguate similar scenes across hours-long content, and jointly use both high-level and fine-grained information.

The examples include cases from TV series such as *Downton Abbey*, where the model successfully navigates multi-hour narratives, repeatedly locating the correct characters, objects, or events despite substantial visual similarity across episodes.

### D. Failure Examples

Although LongVideo-R1 performs well across various long-video benchmarks, failure cases still occur (Figure 8, Figure 9). When a visually similar but irrelevant object appears in the video, the model sometimes commits to the wrong branch and fails to return to the correct segment.

We also find that simple textual hints can often guide the model back to the correct segment and enable it to produce the correct answer.

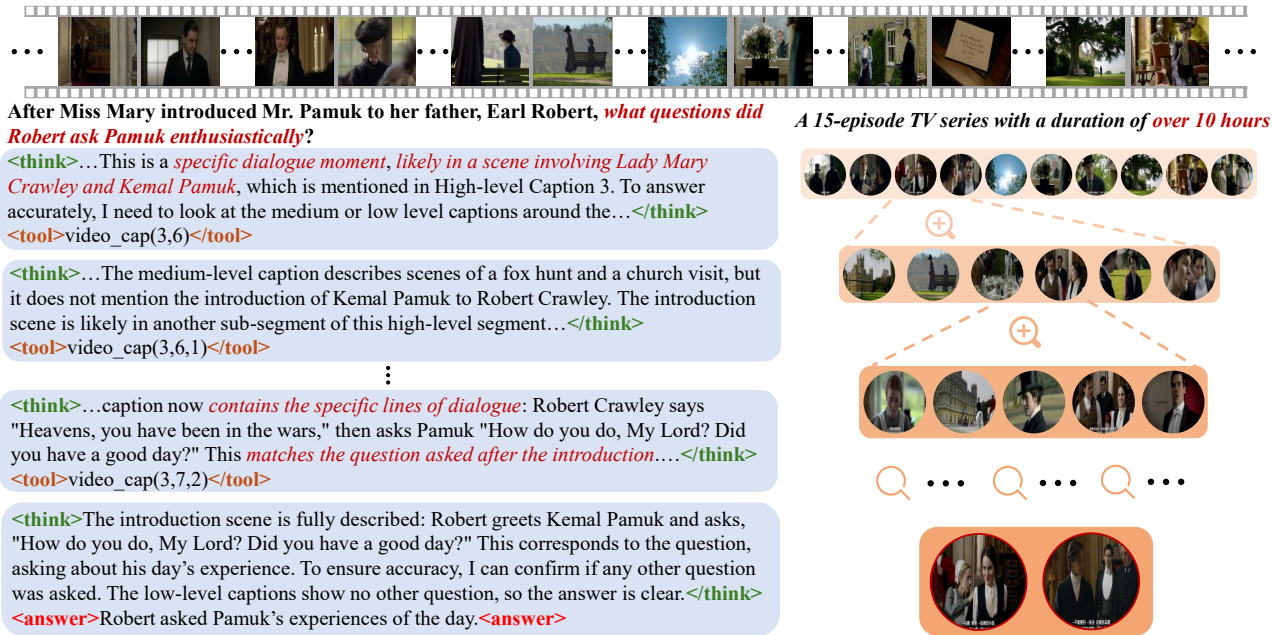

Figure 5. More example on ultra-long videos.

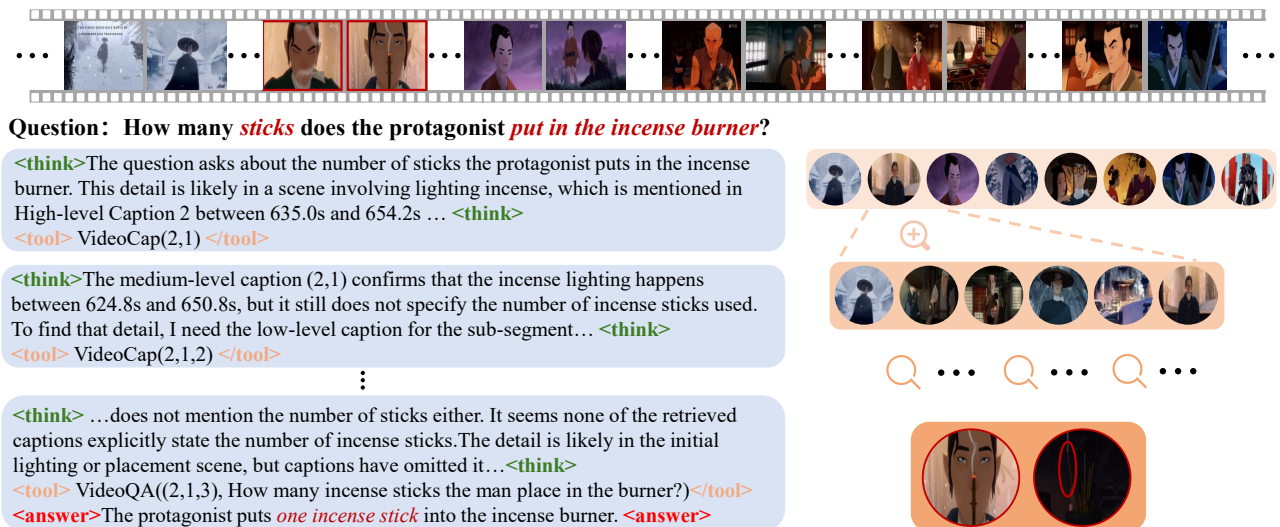

Figure 6. More qualitative examples.

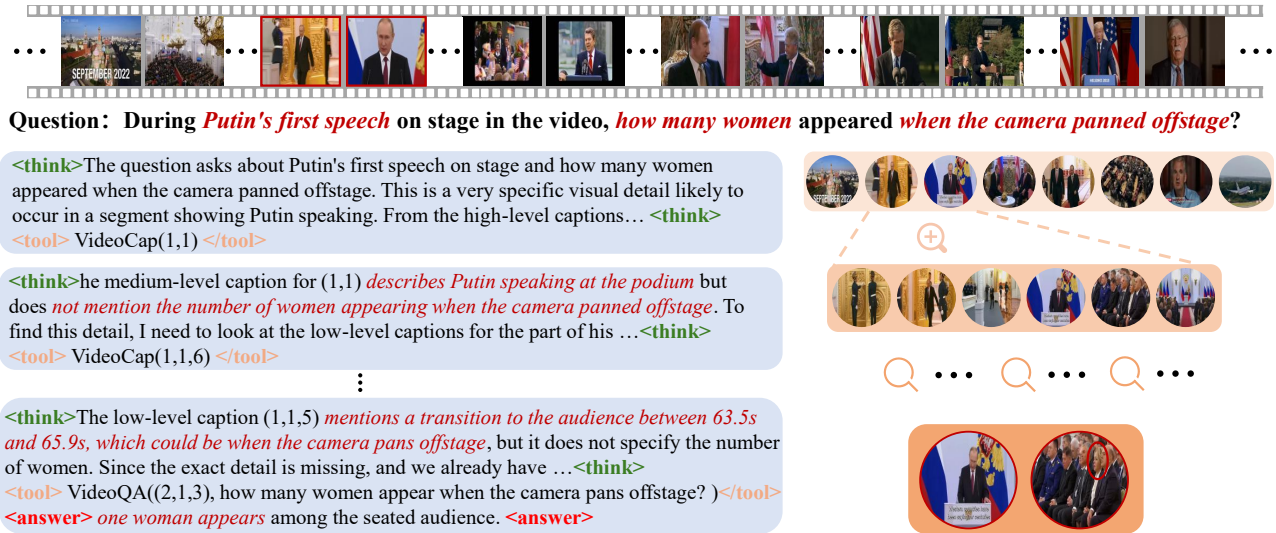

Figure 7. More qualitative examples.

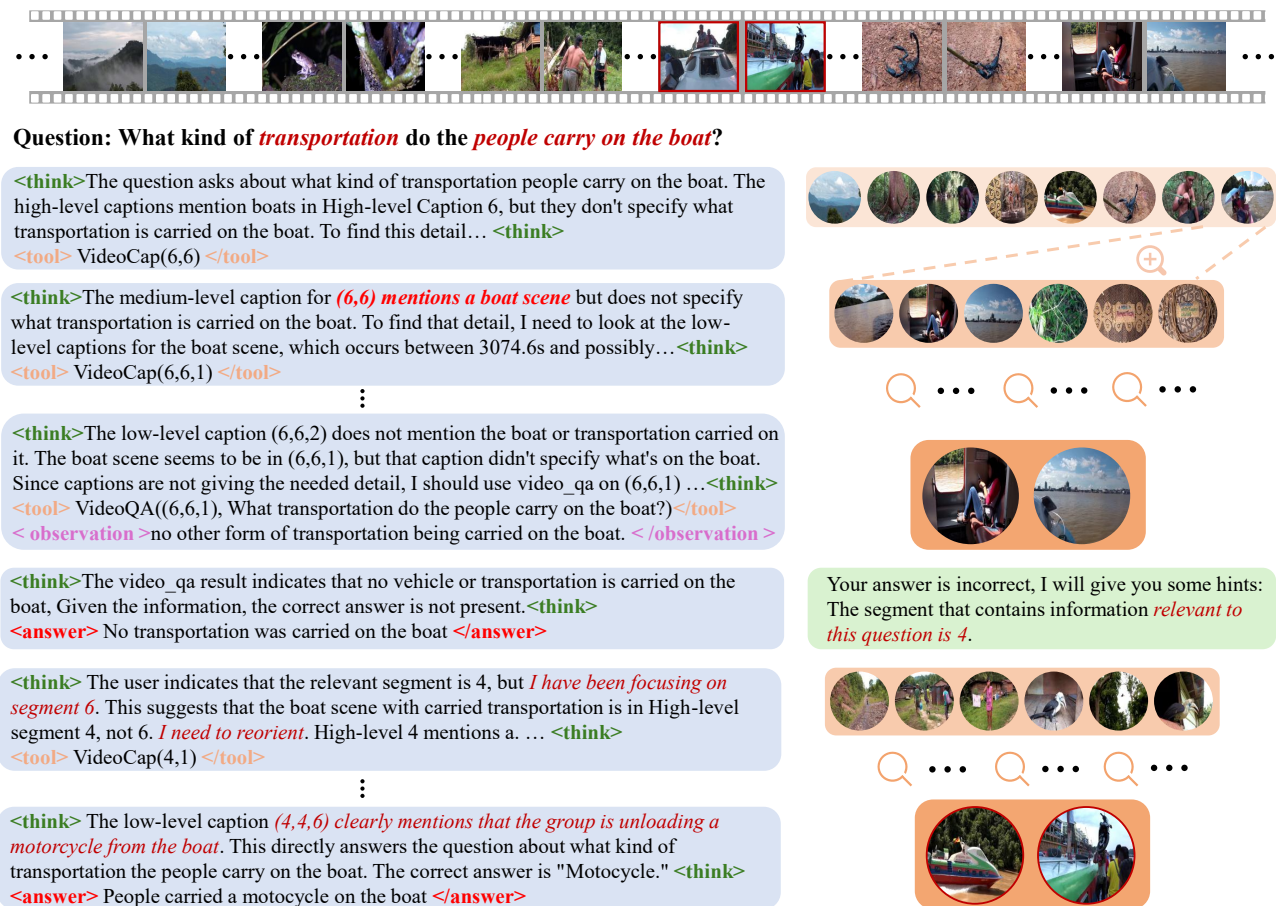

Figure 8. LongVideo-R1 may sometimes be disturbed by similar information, but people can guide the model back on track with just a few hints.

**Question: What is the *name of the dog that plays the piano*?**

**<think>**The question asks for the name of the dog that plays the piano. The high-level captions provided do not mention any dog playing piano; they describe various dog acts, tricks, and performances, but not the specific detail of a dog playing piano ... **<think>**  
**<tool>** VideoCap(6,3) **</tool>**

**<think>**...within High-level 6, possibly (6,2) or (6,4). **Since High-level 6 mentions a woman performing with a dog accompanied by a pianist**, I should check the medium-level caption for (6,2) to see if it contains the piano act and possibly the dog's ... **<think>**  
**<tool>** VideoCap(6,2) **</tool>**

⋮

**<think>**The videoqa result for (6,2,5) **indicates the dog's name is "Mouse"** but clarifies that **the dog isn't shown playing the piano in these frames**. However, the question specifically asks for the dog that plays the piano, so "Mouse" might not be the correct answer... **<think>**  
**<tool>** VideoQA((6,2,2), "What is the name of the dog that plays the piano?") **</tool>**  
**<observation >**The name of the dog that plays the piano is not provided. **</observation >**

**<think>**After multiple attempts, none of the captions or videoqa results have revealed the dog's name. I cannot deduce it from the given information ... **<think>**  
**<answer>** I cannot deduce the dog's name. **</answer>**

**<think>** The user indicates that the relevant segment is 1, but the high-level caption for segment 1 describes a dog performing tricks, not playing piano. I should get the medium-level caption for (1,3) or (1,4) to see if the dog's name is given... **<think>**  
**<tool>** VideoCap(1,3) **</tool>**

⋮

**<think>** The **caption (1,3,4) explicitly mentions the dog's name as Bonnie, confirming that Bonnie is the dog in the act with the piano**. Since the question asks for the name of the dog that plays the piano, the correct answer is Bonnie. **<think>**  
**<answer>** The name of the dog that plays the piano is **Bonnie**. **</answer>**

**A 102 minutes video with about 20 performers**

Q ... Q ... Q ...

Your answer is incorrect, I will give you some hints:  
 The segment that contains information **relevant to this question is 1**.

Q ... Q ... Q ...

Figure 9. LongVideo-R1 may sometimes be disturbed by similar information, but people can guide the model back on track with just a few hints.
